# Supplementary material for: Association between sarcopenia and cardiovascular disease among middle-aged and older adults: Findings from the China health and retirement longitudinal study
Source: PubMed Central journal article supplement — eClinicalMedicine. 2022 Jan 10;44:101264. doi: 10.1016/j.eclinm.2021.101264 (PMC8760427; doi:10.1016/j.eclinm.2021.101264), 2022-01-10
Supplement: mmc3.pdf [file mmc3.pdf]

## **Supplementary material**

### **Association between sarcopenia and cardiovascular disease among middle-aged and older adults: Findings from the China Health and Retirement Longitudinal Study**

Ke Gao, Li-Fei Cao, Wen-Zhuo Ma, Ya-Jie Gao, Miao-Sha Luo, Jiao Zhu, Tian Li\*, Dan Zhou\*

**Table S1 Baseline characteristics of 11863 participants without CVD by sarcopenia status in the longitudinal analysis**

| Characteristics                         | No sarcopenia<br>(n=8425) | Possible sarcopenia<br>(n=2627) | Sarcopenia<br>(n=811)  | P      |
|-----------------------------------------|---------------------------|---------------------------------|------------------------|--------|
| Age, y                                  | 57.5 ± 8.4                | 64.4 ± 10.0 ***                 | 67.5 ± 10.5 ***        | <0.001 |
| Male, n (%)                             | 4178 (49.6)               | 1018 (38.8) ***                 | 460 (56.7) ***         | <0.001 |
| Married (vs others)                     | 7728 (91.7)               | 2086 (79.4) ***                 | 645 (79.5) ***         | <0.001 |
| Rural (vs urban)                        | 7462 (88.6)               | 2373 (90.3) *                   | 769 (94.8) ***         | <0.001 |
| Smoking <sup>a</sup>                    | 2429 (34.1)               | 641 (27.1) ***                  | 315 (41.9) ***         | <0.001 |
| Drinking <sup>a</sup>                   | 2208 (37.2)               | 573 (27.7) ***                  | 232 (35.5)             | <0.001 |
| Educational level <sup>a</sup>          |                           |                                 |                        |        |
| Elementary school or below              | 4116 (66.3)               | 1831 (81.5) ***                 | 611 (86.1) ***         | <0.001 |
| Secondary school                        | 2149 (32.3)               | 407 (18.1) ***                  | 95 (13.4) ***          |        |
| College and above                       | 91 (1.4)                  | 10 (0.4) ***                    | 4 (0.6)                |        |
| BMI category, n (%)                     |                           |                                 |                        |        |
| Underweight                             | 349 (4.1)                 | 134 (5.1) *                     | 168 (20.7) ***         | <0.001 |
| Normal weight                           | 4069 (48.3)               | 1274 (48.5)                     | 500 (61.7) ***         |        |
| Overweight or obese                     | 4007 (47.6)               | 1219 (46.4)                     | 143 (17.6) ***         |        |
| Blood pressure, mm Hg                   |                           |                                 |                        |        |
| Systolic                                | 127 ± 19                  | 131 ± 21 ***                    | 128 ± 21               | <0.001 |
| Diastolic                               | 76 ± 12                   | 75 ± 12 **                      | 73 ± 11 ***            | <0.001 |
| Comorbidities, n (%)                    |                           |                                 |                        |        |
| Hypertension                            | 2253 (26.7)               | 959 (36.5) ***                  | 242 (29.8)             | <0.001 |
| Dyslipidemia                            | 569 (6.8)                 | 201 (7.7)                       | 30 (3.7) **            | <0.001 |
| Diabetes                                | 574 (6.8)                 | 239 (9.1) ***                   | 61 (7.5)               | <0.001 |
| Kidney disease                          | 402 (4.8)                 | 149 (5.7)                       | 52 (6.4) *             | 0.011  |
| History of medication use, n (%)        |                           |                                 |                        |        |
| Diabetes medications <sup>a</sup>       | 379 (4.5)                 | 177 (6.8) ***                   | 37 (4.6)               | <0.001 |
| Hypertension medications <sup>a</sup>   | 1479 (17.8)               | 754 (29.2) ***                  | 171 (21.6) **          | <0.001 |
| Lipid-lowering therapy <sup>a</sup>     | 490 (5.9)                 | 177 (6.9)                       | 30 (3.8) *             | 0.005  |
| Metabolic biomarkers <sup>b</sup>       |                           |                                 |                        |        |
| Total cholesterol, mg/dL                | 184.4 ± 36.0              | 183.7 ± 36.6                    | 177.3 ± 33.9 ***       | <0.001 |
| Triglycerides, mg/dL                    | 114.2 (83.2, 170.8)       | 119.5 (85.8, 174.3)             | 92.0 (70.0, 132.7) *** | <0.001 |
| LDL cholesterol, mg/dL                  | 102.5 ± 28.7              | 102.4 ± 28.7                    | 97.9 ± 26.8 ***        | <0.001 |
| HDL cholesterol, mg/dL                  | 51.5 ± 11.3               | 50.6 ± 11.4 **                  | 53.9 ± 13.2 ***        | <0.001 |
| eGFR, mL/min/1.73 m <sup>2</sup>        | 97.0 ± 21.6               | 94.6 ± 23.8 ***                 | 94.2 ± 24.4 ***        | <0.001 |
| Handgrip strength, kg                   | 33.0 ± 9.2                | 21.9 ± 10.0 ***                 | 22.1 ± 7.7 ***         | <0.001 |
| ASM/Ht <sup>2</sup> , kg/m <sup>2</sup> | 7.2 ± 1.5                 | 7.5 ± 1.0 ***                   | 5.6 ± 2.2 ***          | <0.001 |

Data are shown as means ± standard deviation, median (interquartile range), or numbers (percentages).

<sup>a</sup> Missing data: 1615 for smoking, 3208 for drinking, 2249 for educational level, 116 for diabetes medications, 196 for hypertension medications and 220 for lipid-lowering therapy.

<sup>b</sup> Measured in subpopulation of 9753 participants.

Abbreviation: ASM, appendicular skeletal muscle; BMI, body mass index; CVD, cardiovascular disease; LDL, low-density lipoprotein; HDL, high-density lipoprotein; eGFR, estimated glomerular filtration rate.

---

Significant at  $*P < 0.05$ ,  $**P < 0.01$  and  $***P < 0.001$  compared to no sarcopenia group.

**Table S2. Cross-sectional association between sarcopenia status, CVD and its components among all participants**

| Outcome                       | Cases, n (%) | OR (95% CI)          |                      |                      |
|-------------------------------|--------------|----------------------|----------------------|----------------------|
|                               |              | Model 1 <sup>a</sup> | Model 2 <sup>b</sup> | Model 3 <sup>c</sup> |
| <b>Cardiovascular disease</b> |              |                      |                      |                      |
| No sarcopenia (n=10280)       | 1026 (10.0)  | Reference            | Reference            | Reference            |
| Possible sarcopenia (n=3685)  | 668 (18.1)   | 1.46 (1.30–1.63) *** | 1.54 (1.36–1.74) *** | 1.29 (1.13–1.48) *** |
| Sarcopenia (n=1172)           | 211 (18.0)   | 1.35 (1.14–1.61) **  | 1.71 (1.41–2.06) *** | 1.72 (1.40–2.10) *** |
| <b>Heart disease</b>          |              |                      |                      |                      |
| No sarcopenia (n=10280)       | 936 (9.1)    | Reference            | Reference            | Reference            |
| Possible sarcopenia (n=3685)  | 564 (15.3)   | 1.31 (1.16–1.48) *** | 1.39 (1.22–1.59) *** | 1.17 (1.01–1.35) *   |
| Sarcopenia (n=1172)           | 179 (15.3)   | 1.25 (1.04–1.50) *   | 1.59 (1.30–1.95) *** | 1.55 (1.25–1.93) *** |
| <b>Stroke</b>                 |              |                      |                      |                      |
| No sarcopenia (n=10280)       | 120 (1.2)    | Reference            | Reference            | Reference            |
| Possible sarcopenia (n=3685)  | 146 (4.0)    | 2.75 (2.11–3.58) *** | 2.74 (2.07–3.65) *** | 2.18 (1.60–2.97) *** |
| Sarcopenia (n=1172)           | 44 (3.8)     | 2.18 (1.49–3.18) *** | 2.48 (1.63–3.77) *** | 2.70 (1.75–4.16) *** |

Abbreviation: OR, Odds ratio; CVD, cardiovascular disease.

<sup>a</sup> Model 1 was adjusted for age, sex.

<sup>b</sup> Model 2 was adjusted for age, sex, residence, marital status, educational level, smoking status, drinking status and body mass index.

<sup>c</sup> Model 3 was adjusted as model 2 with further adjustment for systolic blood pressure, diastolic blood pressure; history of hypertension, dyslipidemia, diabetes and chronic kidney disease; and use hypertension medications, diabetes medications, and lipid-lowering therapy.

<sup>+</sup> $P < 0.1$ .

<sup>\*</sup> $P < 0.05$ .

<sup>\*\*</sup> $P < 0.01$ .

<sup>\*\*\*</sup> $P < 0.001$ .

**Table S3. Cross-sectional association of sarcopenia status with CVD in subpopulations of 12318 participants with metabolic biomarkers measurements**

| Outcome                        | OR (95% CI)            |                     |                      |
|--------------------------------|------------------------|---------------------|----------------------|
|                                | Cardiovascular disease | Heart disease       | Stroke               |
| <b>No sarcopenia</b>           | Reference              | Reference           | Reference            |
| <b>Possible sarcopenia</b>     |                        |                     |                      |
| Model 3 <sup>c</sup>           | 1.29 (1.12–1.50) **    | 1.14 (0.98–1.33) +  | 2.28 (1.63–3.19) *** |
| Model adjusted as model 3 plus |                        |                     |                      |
| Total Cholesterol              | 1.29 (1.12–1.50) **    | 1.14 (0.98–1.33) +  | 2.28 (1.62–3.19) *** |
| LDL cholesterol                | 1.29 (1.11–1.49) **    | 1.14 (0.98–1.33) +  | 2.28 (1.63–3.20) *** |
| HDL cholesterol                | 1.29 (1.11–1.49) **    | 1.14 (0.98–1.33) +  | 2.26 (1.61–3.16) *** |
| Triglycerides                  | 1.29 (1.12–1.50) **    | 1.14 (0.98–1.34) +  | 2.28 (1.63–3.20) *** |
| eGFR                           | 1.29 (1.12–1.50) **    | 1.14 (0.98–1.34) +  | 2.34 (1.66–3.28) *** |
| All biomarkers                 | 1.29 (1.12–1.50) **    | 1.14 (0.97–1.33)    | 2.31 (1.65–3.24) *** |
| <b>Sarcopenia</b>              |                        |                     |                      |
| Model 3 <sup>c</sup>           | 1.62 (1.29–2.03) ***   | 1.46 (1.15–1.86) ** | 2.66 (1.63–4.33) *** |
| Model adjusted as model 3 plus |                        |                     |                      |
| Total Cholesterol              | 1.62 (1.29–2.03) ***   | 1.46 (1.15–1.86) ** | 2.65 (1.63–4.32) *** |
| LDL cholesterol                | 1.61 (1.28–2.02) ***   | 1.45 (1.14–1.85) ** | 2.67 (1.64–4.35) *** |
| HDL cholesterol                | 1.62 (1.29–2.03) ***   | 1.46 (1.15–1.86) ** | 2.65 (1.62–4.32) *** |
| Triglycerides                  | 1.62 (1.29–2.04) ***   | 1.47 (1.16–1.87) ** | 2.67 (1.64–4.35) *** |
| eGFR                           | 1.62 (1.29–2.03) ***   | 1.45 (1.14–1.85) ** | 2.79 (1.71–4.56) *** |
| All biomarkers                 | 1.62 (1.29–2.03) ***   | 1.45 (1.14–1.85) ** | 2.82 (1.73–4.61) *** |

Abbreviation: CVD, cardiovascular disease; ORs, odds ratios; LDL, low-density lipoprotein; HDL, high-density lipoprotein; eGFR, estimated glomerular filtration rate.

<sup>c</sup> Model 3 was adjusted for age, sex, residence, marital status, educational level, smoking status, drinking status and body mass index, systolic blood pressure, diastolic blood pressure; history of hypertension, dyslipidemia, diabetes and chronic kidney disease; and use hypertension medications, diabetes medications, and lipid-lowering therapy.

+ $P < 0.1$ .

\* $P < 0.05$ .

\*\* $P < 0.01$ .

\*\*\* $P < 0.001$ .

**Table S4. Longitudinal association of sarcopenia status with CVD in subpopulations of 9753 participants with metabolic biomarkers measurements**

| Outcome                        | HR (95% CI)            |                  |                      |
|--------------------------------|------------------------|------------------|----------------------|
|                                | Cardiovascular disease | Heart disease    | Stroke               |
| <b>No sarcopenia</b>           | Reference              | Reference        | Reference            |
| <b>Possible sarcopenia</b>     |                        |                  |                      |
| Model 3 <sup>c</sup>           | 1.21 (1.03–1.43) *     | 1.05 (0.84–1.30) | 1.59 (1.24–2.03) *** |
| Model adjusted as model 3 plus |                        |                  |                      |
| Total Cholesterol              | 1.21 (1.03–1.43) *     | 1.05 (0.84–1.30) | 1.59 (1.24–2.04) *** |
| LDL cholesterol                | 1.21 (1.03–1.43) *     | 1.05 (0.84–1.30) | 1.59 (1.24–2.04) *** |
| HDL cholesterol                | 1.21 (1.03–1.43) *     | 1.04 (0.84–1.30) | 1.57 (1.23–2.02) *** |
| Triglycerides                  | 1.21 (1.03–1.44) *     | 1.05 (0.84–1.30) | 1.59 (1.24–2.04) *** |
| eGFR                           | 1.21 (1.03–1.44) *     | 1.05 (0.84–1.30) | 1.60 (1.25–2.05) *** |
| All biomarkers                 | 1.21 (1.03–1.43) *     | 1.04 (0.84–1.30) | 1.60 (1.25–2.05) *** |
| <b>Sarcopenia</b>              |                        |                  |                      |
| Model 3 <sup>c</sup>           | 1.37 (1.05–1.79) *     | 1.23 (0.87–1.74) | 1.72 (1.18–2.52) **  |
| Model adjusted as model 3 plus |                        |                  |                      |
| Total Cholesterol              | 1.37 (1.05–1.79) *     | 1.23 (0.87–1.74) | 1.73 (1.18–2.53) **  |
| LDL cholesterol                | 1.37 (1.05–1.79) *     | 1.23 (0.87–1.74) | 1.72 (1.18–2.52) **  |
| HDL cholesterol                | 1.37 (1.05–1.79) *     | 1.23 (0.87–1.74) | 1.72 (1.17–2.51) **  |
| Triglycerides                  | 1.38 (1.06–1.80) *     | 1.24 (0.87–1.75) | 1.74 (1.19–2.55) **  |
| eGFR                           | 1.38 (1.06–1.79) *     | 1.23 (0.87–1.74) | 1.75 (1.19–2.56) **  |
| All biomarkers                 | 1.39 (1.06–1.81) *     | 1.23 (0.87–1.74) | 1.77 (1.21–2.59) **  |

Abbreviation: CVD, cardiovascular disease; HR, hazard ratio; LDL, low-density lipoprotein; HDL, high-density lipoprotein; eGFR, estimated glomerular filtration rate.

<sup>c</sup> Model 3 was adjusted for age, sex, residence, marital status, educational level, smoking status, drinking status and body mass index, systolic blood pressure, diastolic blood pressure; history of hypertension, dyslipidemia, diabetes and chronic kidney disease; and use hypertension medications, diabetes medications, and lipid-lowering therapy.

<sup>+</sup> $P < 0.1$ .

\* $P < 0.05$ .

\*\* $P < 0.01$ .

\*\*\* $P < 0.001$ .

**Table S5. Risk of newly onset CVD between possible sarcopenia and sarcopenia subgroups**

| Outcome              | Cases,<br>No. | Incidence Rate, per<br>1000 Person-Years | HR (95% CI)                    |                      |                      |
|----------------------|---------------|------------------------------------------|--------------------------------|----------------------|----------------------|
|                      |               |                                          | Model 1 <sup>a</sup>           | Model 2 <sup>b</sup> | Model 3 <sup>c</sup> |
| <b>CVD</b>           |               |                                          |                                |                      |                      |
| Possible sarcopenia  | 376           | 39.67                                    | Reference                      | Reference            | Reference            |
| Sarcopenia           | 108           | 36.99                                    | 0.90 (0.73, 1.12)              | 1.01 (0.79, 1.30)    | 1.09 (0.84, 1.40)    |
| <b>Heart disease</b> |               |                                          |                                |                      |                      |
| Possible sarcopenia  | 217           | 22.67                                    | Reference                      | Reference            | Reference            |
| Sarcopenia           | 66            | 22.35                                    | 0.99 (0.75, 1.31)              | 1.10 (0.80, 1.51)    | 1.13 (0.81, 1.58)    |
| <b>Stroke</b>        |               |                                          |                                |                      |                      |
| Possible sarcopenia  | 184           | 19.18                                    | Reference                      | Reference            | Reference            |
| Sarcopenia           | 51            | 17.17                                    | 0.73 (0.53, 1.00) <sup>+</sup> | 0.81 (0.57, 1.16)    | 0.90 (0.63, 1.30)    |

Abbreviation: HR, hazard ratio; CVD, cardiovascular disease.

<sup>a</sup> Model 1 was adjusted for age, sex.

<sup>b</sup> Model 2 was adjusted for age, sex, residence, marital status, educational level, smoking status, drinking status and body mass index.

<sup>c</sup> Model 3 was adjusted as model 2 with further adjustment for systolic blood pressure, diastolic blood pressure; history of hypertension, dyslipidemia, diabetes and chronic kidney disease; and use hypertension medications, diabetes medications, and lipid-lowering therapy.

<sup>+</sup> $P < 0.1$ .

**Table S6. Cross-sectional association between low muscle mass alone and CVD stratified by sex in CHARLS 2015**

| Outcome                        | Cases, n (%) | OR (95% CI)          |                      |                      |
|--------------------------------|--------------|----------------------|----------------------|----------------------|
|                                |              | Model 1 <sup>a</sup> | Model 2 <sup>b</sup> | Model 3 <sup>c</sup> |
| <b>Cardiovascular disease</b>  |              |                      |                      |                      |
| Men (n=5104)                   |              |                      |                      |                      |
| Reference (n=4093)             | 375 (9.2)    | 1                    | 1                    | 1                    |
| Low muscle mass alone (n=1011) | 77 (7.6)     | 0.54 (0.42–0.71) *** | 0.78 (0.55–1.10)     | 0.95 (0.66–1.37)     |
| Women (n=5176)                 |              |                      |                      |                      |
| Reference (n=4086)             | 447 (10.9)   | 1                    | 1                    | 1                    |
| Low muscle mass alone (n=1090) | 127 (11.7)   | 1.07 (0.86–1.32)     | 1.13 (0.90–1.43)     | 1.11 (0.87–1.42)     |
| <b>Heart disease</b>           |              |                      |                      |                      |
| Men (n=5104)                   |              |                      |                      |                      |
| Reference (n=4093)             | 419 (10.3)   | 1                    | 1                    | 1                    |
| Low muscle mass alone (n=1011) | 119 (10.9)   | 0.58 (0.44–0.77) *** | 0.63 (0.90–1.29)     | 0.73 (1.08–1.59)     |
| Women (n=5176)                 |              |                      |                      |                      |
| Reference (n=4086)             | 457 (11.1)   | 1                    | 1                    | 1                    |
| Low muscle mass alone (n=1090) | 81 (7.8)     | 1.07 (0.86–1.33)     | 1.14 (0.90–1.45)     | 1.12 (0.87–1.44)     |
| <b>Stroke</b>                  |              |                      |                      |                      |
| Men (n=5104)                   |              |                      |                      |                      |
| Reference (n=4093)             | 60 (1.5)     | 1                    | 1                    | 1                    |
| Low muscle mass alone (n=1011) | 11 (1.1)     | 0.52 (0.27–1.00)     | 0.67 (0.28–1.53)     | 0.32 (0.79–1.97)     |
| Women (n=5176)                 |              |                      |                      |                      |
| Reference (n=4086)             | 39 (1.0)     | 1                    | 1                    | 1                    |
| Low muscle mass alone (n=1090) | 10 (0.9)     | 0.95 (0.47–1.92)     | 0.87 (0.40–1.89)     | 0.86 (0.37–2.00)     |

Abbreviation: OR, odds ratio; CVD, cardiovascular disease.

Reference was a group of the participants without any sarcopenia components; Low muscle mass alone: low muscle mass with neither low grip strength nor slow physical performance.

<sup>a</sup> Model 1 was adjusted for age.

<sup>b</sup> Model 2 was adjusted for age, residence, marital status, educational level, smoking status, drinking status and body mass index.

<sup>c</sup> Model 3 was adjusted as model 2 with further adjustment for systolic blood pressure, diastolic blood pressure; history of hypertension, dyslipidemia, diabetes and chronic kidney disease; and use hypertension medications, diabetes medications, and lipid-lowering therapy.

\* $P < 0.05$ .

\*\* $P < 0.01$ .

\*\*\* $P < 0.001$ .



**Table S7. Longitudinal association of low muscle mass alone with incident CVD stratified by sex, 2015-2018**

| Outcome                       | Cases, No. | Incidence Rate, per 1000 Person-Years | HR (95% CI)                   |                      |                               |
|-------------------------------|------------|---------------------------------------|-------------------------------|----------------------|-------------------------------|
|                               |            |                                       | Model 1 <sup>a</sup>          | Model 2 <sup>b</sup> | Model 3 <sup>c</sup>          |
| <b>Cardiovascular disease</b> |            |                                       |                               |                      |                               |
| Men (n=4178)                  |            |                                       |                               |                      |                               |
| Reference (n=3343)            | 309        | 25.36                                 | 1                             | 1                    | 1                             |
| Low muscle mass alone (n=835) | 57         | 18.54                                 | 0.62 (0.46–0.83)**            | 0.72 (0.49–1.06)     | 0.85 (0.57–1.27)              |
| Women (n=4247)                |            |                                       |                               |                      |                               |
| Reference (n=3399)            | 353        | 28.70                                 | 1                             | 1                    | 1                             |
| Low muscle mass alone (n=848) | 70         | 22.60                                 | 0.80 (0.62–1.04) <sup>+</sup> | 0.73 (0.54–0.99)*    | 0.74 (0.54–1.02)              |
| <b>Heart disease</b>          |            |                                       |                               |                      |                               |
| Men (n=4178)                  |            |                                       |                               |                      |                               |
| Reference (n=3343)            | 193        | 15.72                                 | 1                             | 1                    | 1                             |
| Low muscle mass alone (n=835) | 41         | 13.30                                 | 0.75 (0.53–1.06)              | 0.89 (0.54–1.47)     | 0.96 (0.57–1.60)              |
| Women (n=4247)                |            |                                       |                               |                      |                               |
| Reference (n=3399)            | 267        | 21.57                                 | 1                             | 1                    | 1                             |
| Low muscle mass alone (n=848) | 49         | 15.76                                 | 0.72 (0.53–0.98)*             | 0.67 (0.46–0.97)*    | 0.68 (0.46–1.00) <sup>+</sup> |
| <b>Stroke</b>                 |            |                                       |                               |                      |                               |
| Men (n=4178)                  |            |                                       |                               |                      |                               |
| Reference (n=3343)            | 132        | 10.72                                 | 1                             | 1                    | 1                             |
| Low muscle mass alone (n=835) | 18         | 5.84                                  | 0.41 (0.25–0.68)**            | 0.44 (0.23–0.82)**   | 0.58 (0.31–1.10)              |
| Women (n=4247)                |            |                                       |                               |                      |                               |
| Reference (n=3399)            | 100        | 7.95                                  | 1                             | 1                    | 1                             |
| Low muscle mass alone (n=848) | 23         | 7.28                                  | 0.95 (0.60–1.49)              | 0.83 (0.50–1.38)     | 0.87 (0.51–1.47)              |

Abbreviation: HR, hazard ratio; CVD, cardiovascular disease. Reference was a group of the participants without any sarcopenia components; Low muscle mass alone: low muscle mass with neither low grip strength nor slow physical performance.

<sup>a</sup> Model 1 was adjusted for age

<sup>b</sup> Model 2 was adjusted for age, residence, marital status, educational level, smoking status, drinking status and body mass index.

<sup>c</sup> Model 3 was adjusted as model 2 with further adjustment for systolic blood pressure, diastolic blood pressure; history of hypertension, dyslipidemia, diabetes and chronic kidney disease; and use hypertension medications, diabetes medications, and lipid-lowering therapy.

<sup>+</sup> $P < 0.1$ .

\* $P < 0.05$ .

\*\* $P < 0.01$ .
